# Supplementary material for: Dietary phytochemical intake from foods and health outcomes: a systematic review protocol and preliminary scoping
Source: PubMed Central journal article supplement — BMJ Open. 2017 Feb 15;7(2):e013337. doi: 10.1136/bmjopen-2016-013337 (PMC5318549; doi:10.1136/bmjopen-2016-013337), 2017-02-15
Supplement: bmjopen-2016-013337supp_appendix.pdf [file bmjopen-2016-013337supp_appendix.pdf]

## **APPENDICES**

### **Appendix 1 – Search Terms**

1. Terpene\*
2. Carotenoid\*
3. Limonoid\*
4. Phytosterol\*
5. Thiol\*
6. Glucosinolate\*
7. Indole\*
8. Isoprenoid\*
9. Lipoic acid
10. Ubiquinone
11. Phenolic acid
12. Flavonoid\*
13. Flavanol\*
14. Tannin\*
15. Stilbene\*
16. Lignans
17. Isoflavone\*
18. Anthocyanin\*
19. Flavanone\*
20. Flavonol\*
21. Flavone\*
22. Allicin
23. Capsaicin
24. Catechin
25. Ellagic acid
26. Genistain
27. Lycopene
28. Saponin\*
29. Zeaxanthin
30. Polyphenol\*
31. flavan-3-ol\*
